# Supplementary material
Source: MDPI journal article supplement (https://www.mdpi.com/2673-9992/21/1/38)
Supplement: s1 [file s1]

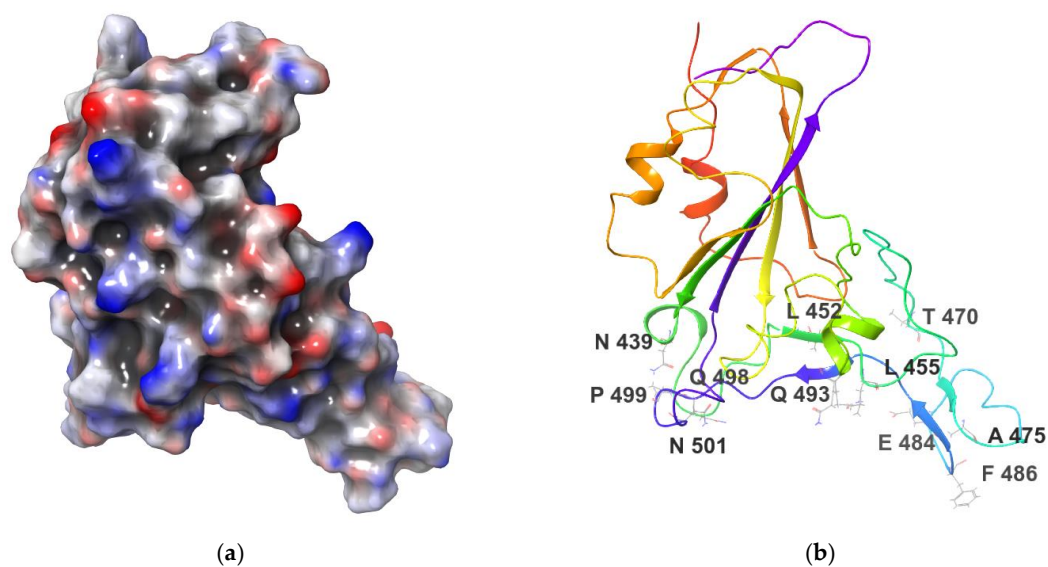

**Figure S1.** Structure of the receptor-binding domain of wild-type SARS-CoV-2 (RBD-W) showing its (a) electrostatic potential map and (b) secondary structure, showing the critical residues surrounding the binding site of ACE2, which is the target of current drug discovery efforts.

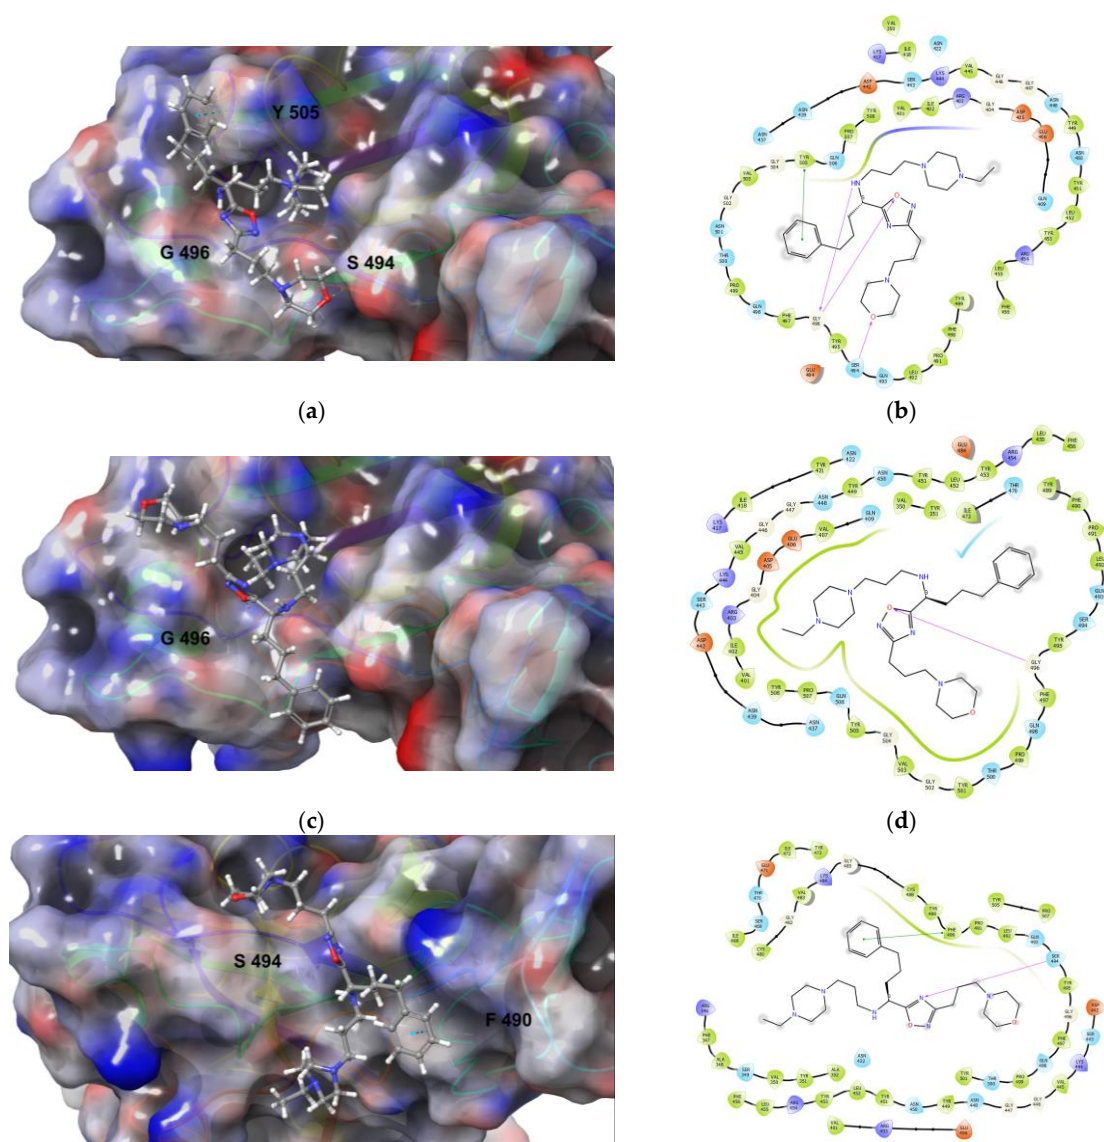

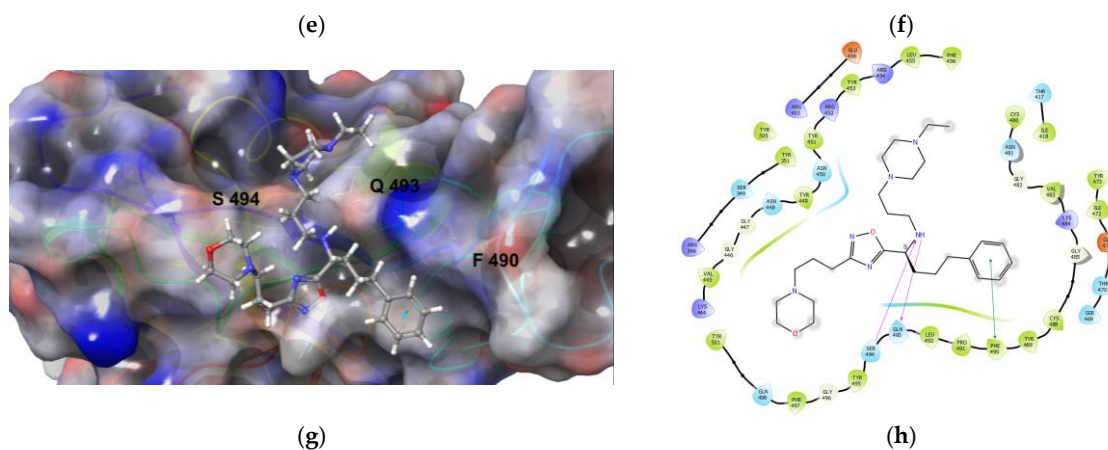

**Figure S2.** Structures of top-performing de novo generated drug-like molecule (Compound ID 526) docked in the RBD of SARS-CoV-2 and their corresponding ligand interaction diagrams: (a–b) wild type; (c–d) B.1.1.7 variant; (e–f) B.1.351 variant; and (g–h) P.1 variant.

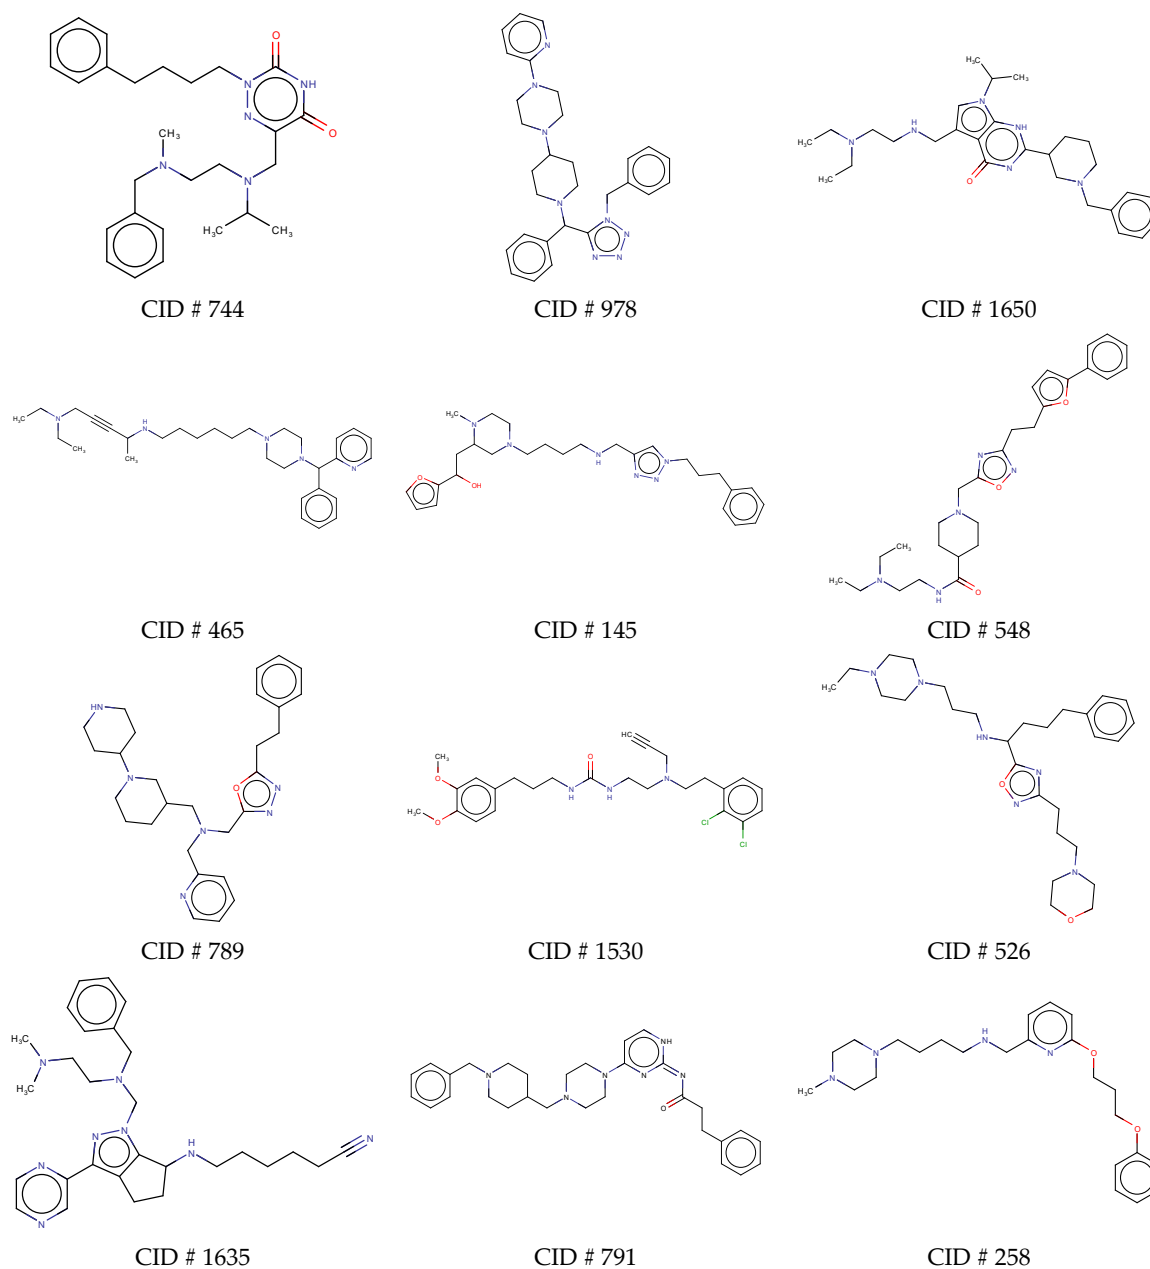

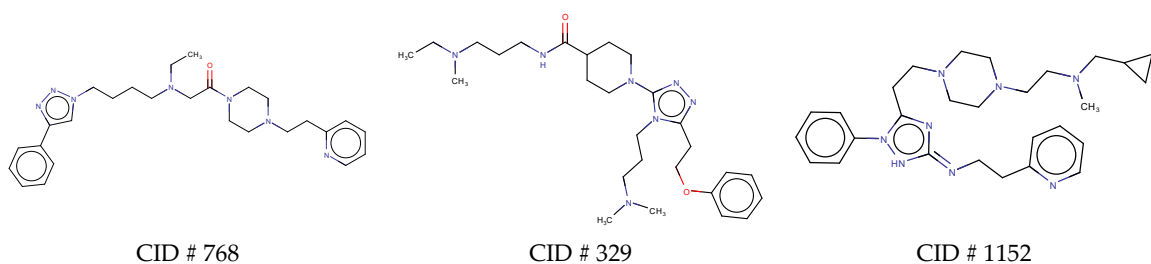

**Figure S3.** Top-performing (1–15) drug-like molecules with respect to inhibiting the RBD of SARS-CoV-2 variants. These molecules were designed de novo using generative neural networks. The 2D structures were created using ChemAxon Marvin Suite.

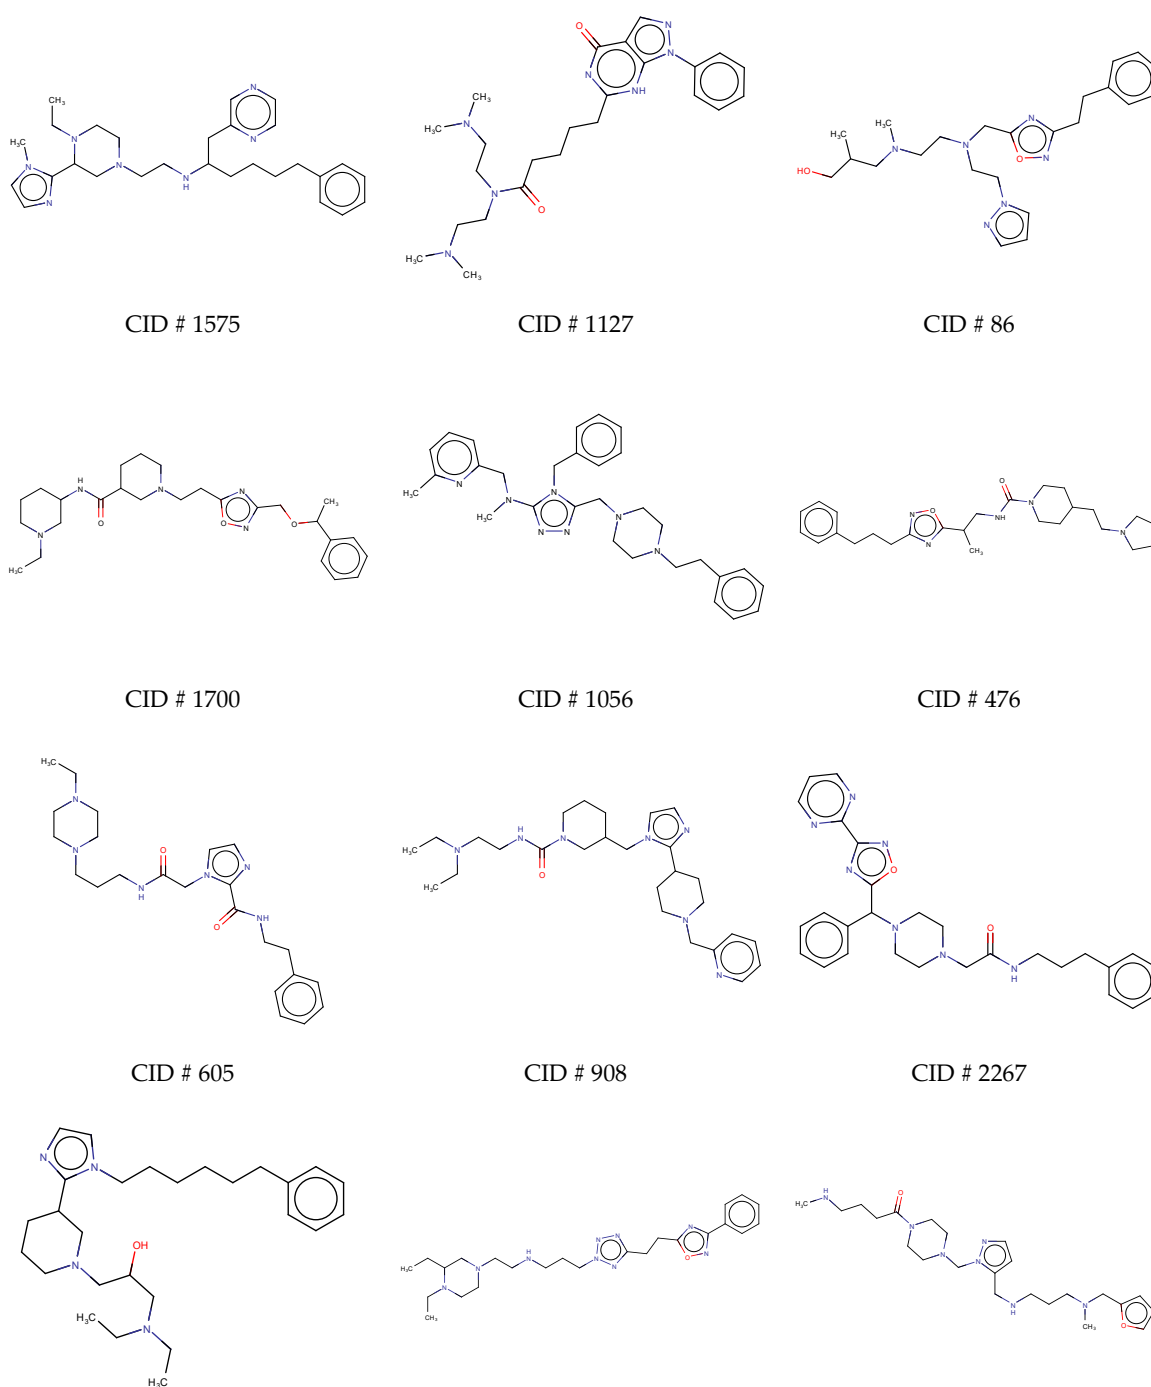

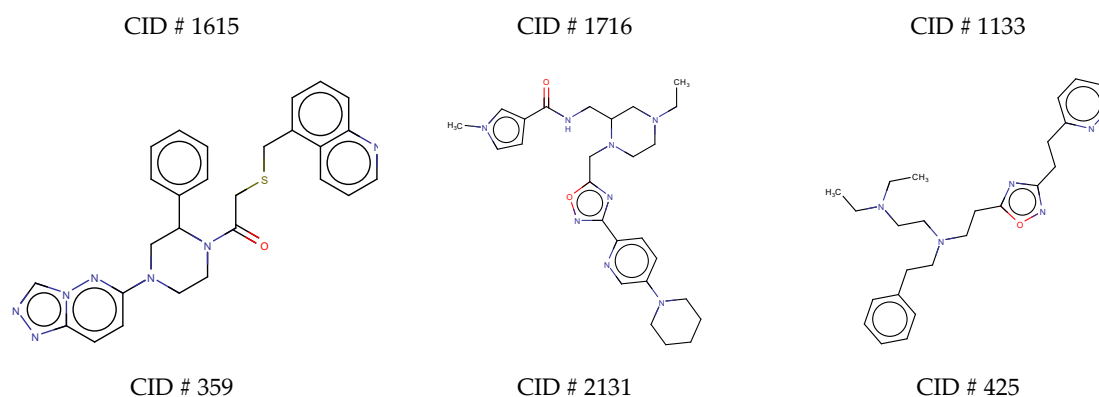

**Figure S4.** Top-performing (16–30) drug-like molecules with respect to inhibiting the RBD of SARS-CoV-2 variants. These molecules were designed de novo using generative neural networks. The 2D structures were created using ChemAxon Marvin Suite.

**Table S1.** Comparison of the performance of top-performing de novo designed drugs in terms of their role as potential inhibitors of the RBD of SARS-CoV-2 variants.

| Compound ID | Formula                                                                       | Docking Score (%) |         |         |       |       |           |
|-------------|-------------------------------------------------------------------------------|-------------------|---------|---------|-------|-------|-----------|
|             |                                                                               | Wild              | B.1.1.7 | B.1.351 | P.1   | Mean  | Std. Dev. |
| CID # 744   | C <sub>27</sub> H <sub>37</sub> N <sub>5</sub> O <sub>2</sub>                 | 91.61             | 93.72   | 93.27   | 93.48 | 93.02 | 0.96      |
| CID # 978   | C <sub>29</sub> H <sub>34</sub> N <sub>8</sub>                                | 92.63             | 93.18   | 93.29   | 91.97 | 92.77 | 0.61      |
| CID # 1650  | C <sub>28</sub> H <sub>42</sub> N <sub>6</sub> O                              | 92.58             | 92.45   | 93.25   | 92.76 | 92.76 | 0.35      |
| CID # 465   | C <sub>31</sub> H <sub>47</sub> N <sub>5</sub>                                | 92.76             | 91.96   | 92.95   | 92.31 | 92.50 | 0.45      |
| CID # 145   | C <sub>27</sub> H <sub>40</sub> N <sub>6</sub> O <sub>2</sub>                 | 92.67             | 93.23   | 92.36   | 91.61 | 92.47 | 0.68      |
| CID # 548   | C <sub>27</sub> H <sub>37</sub> N <sub>5</sub> O <sub>3</sub>                 | 92.57             | 92.36   | 92.41   | 92.43 | 92.44 | 0.09      |
| CID # 789   | C <sub>28</sub> H <sub>38</sub> N <sub>6</sub> O                              | 92.08             | 92.64   | 91.71   | 92.70 | 92.28 | 0.47      |
| CID # 1530  | C <sub>25</sub> H <sub>31</sub> Cl <sub>2</sub> N <sub>3</sub> O <sub>3</sub> | 91.53             | 92.77   | 92.83   | 91.99 | 92.28 | 0.63      |
| CID # 526   | C <sub>28</sub> H <sub>46</sub> N <sub>6</sub> O <sub>2</sub>                 | 92.51             | 92.62   | 91.83   | 92.12 | 92.27 | 0.36      |
| CID # 1635  | C <sub>28</sub> H <sub>38</sub> N <sub>8</sub>                                | 91.06             | 92.72   | 92.52   | 92.60 | 92.23 | 0.78      |
| CID # 791   | C <sub>30</sub> H <sub>38</sub> N <sub>6</sub> O                              | 92.43             | 92.14   | 91.99   | 92.28 | 92.21 | 0.19      |
| CID # 258   | C <sub>24</sub> H <sub>36</sub> N <sub>4</sub> O <sub>2</sub>                 | 90.99             | 93.28   | 91.89   | 92.65 | 92.20 | 0.99      |
| CID # 768   | C <sub>27</sub> H <sub>37</sub> N <sub>7</sub> O                              | 91.98             | 92.11   | 92.25   | 92.45 | 92.20 | 0.20      |
| CID # 329   | C <sub>27</sub> H <sub>45</sub> N <sub>7</sub> O <sub>2</sub>                 | 92.62             | 91.95   | 91.72   | 92.40 | 92.17 | 0.41      |
| CID # 1152  | C <sub>28</sub> H <sub>40</sub> N <sub>8</sub>                                | 91.61             | 92.44   | 92.80   | 91.74 | 92.15 | 0.57      |
| CID # 1575  | C <sub>28</sub> H <sub>41</sub> N <sub>7</sub>                                | 92.28             | 91.41   | 92.30   | 92.12 | 92.03 | 0.42      |
| CID # 1127  | C <sub>24</sub> H <sub>35</sub> N <sub>7</sub> O <sub>2</sub>                 | 91.91             | 92.21   | 91.21   | 92.61 | 91.99 | 0.59      |
| CID # 86    | C <sub>23</sub> H <sub>34</sub> N <sub>6</sub> O <sub>2</sub>                 | 90.96             | 92.94   | 91.77   | 92.27 | 91.99 | 0.83      |
| CID # 1700  | C <sub>26</sub> H <sub>39</sub> N <sub>5</sub> O <sub>3</sub>                 | 91.55             | 92.28   | 91.79   | 92.26 | 91.97 | 0.36      |
| CID # 1056  | C <sub>30</sub> H <sub>37</sub> N <sub>7</sub>                                | 91.57             | 92.55   | 91.79   | 91.88 | 91.95 | 0.42      |
| CID # 476   | C <sub>26</sub> H <sub>39</sub> N <sub>5</sub> O <sub>2</sub>                 | 91.13             | 92.37   | 91.82   | 92.47 | 91.95 | 0.62      |
| CID # 605   | C <sub>23</sub> H <sub>34</sub> N <sub>6</sub> O <sub>2</sub>                 | 91.48             | 92.18   | 92.11   | 91.92 | 91.92 | 0.31      |
| CID # 908   | C <sub>27</sub> H <sub>43</sub> N <sub>7</sub> O                              | 91.79             | 91.79   | 92.01   | 92.09 | 91.92 | 0.15      |
| CID # 2267  | C <sub>28</sub> H <sub>31</sub> N <sub>7</sub> O <sub>2</sub>                 | 91.68             | 92.24   | 91.75   | 91.92 | 91.90 | 0.25      |
| CID # 1615  | C <sub>27</sub> H <sub>44</sub> N <sub>4</sub> O                              | 91.92             | 91.15   | 92.30   | 92.11 | 91.87 | 0.50      |
| CID # 1716  | C <sub>24</sub> H <sub>37</sub> N <sub>9</sub> O                              | 91.45             | 92.34   | 91.39   | 92.22 | 91.85 | 0.50      |
| CID # 1133  | C <sub>23</sub> H <sub>39</sub> N <sub>7</sub> O <sub>2</sub>                 | 91.54             | 91.89   | 91.88   | 92.01 | 91.83 | 0.20      |
| CID # 359   | C <sub>27</sub> H <sub>25</sub> N <sub>7</sub> OS                             | 91.09             | 91.52   | 91.97   | 92.67 | 91.81 | 0.68      |
| CID # 2131  | C <sub>26</sub> H <sub>36</sub> N <sub>8</sub> O <sub>2</sub>                 | 91.18             | 91.69   | 91.90   | 92.42 | 91.80 | 0.51      |
| CID # 425   | C <sub>25</sub> H <sub>35</sub> N <sub>5</sub> O                              | 91.51             | 91.95   | 91.67   | 92.05 | 91.80 | 0.25      |

**Table S2.** ADMET physicochemical properties of top-performing de novo designed drugs in terms of their role as potential inhibitors of the RBD of SARS-CoV-2 variants.

| Compound ID | Physicochemical Properties |
|-------------|----------------------------|
|-------------|----------------------------|

|            | Molar Mass<br>(g mol <sup>-1</sup> ) | Topological<br>Polar Surface<br>Area (Å <sup>2</sup> ) | No. of<br>Hydrogen<br>Bond Donors | No. of<br>Hydrogen<br>Bond<br>Acceptors | LogS<br>(Solubility,<br>mol/L) | LogP<br>(Distribution<br>Coefficient,<br>mol/L) | LogD <sub>7.4</sub><br>(Distribution<br>Coefficient,<br>mol/L) |
|------------|--------------------------------------|--------------------------------------------------------|-----------------------------------|-----------------------------------------|--------------------------------|-------------------------------------------------|----------------------------------------------------------------|
| CID # 744  | 463.29                               | 74.23                                                  | 7                                 | 1                                       | -2.487                         | 3.298                                           | 3.238                                                          |
| CID # 978  | 494.29                               | 66.21                                                  | 8                                 | 0                                       | -2.322                         | 3.147                                           | 3.711                                                          |
| CID # 1650 | 478.34                               | 69.19                                                  | 7                                 | 2                                       | -1.967                         | 3.157                                           | 2.855                                                          |
| CID # 465  | 489.38                               | 34.64                                                  | 5                                 | 1                                       | -2.113                         | 3.866                                           | 3.758                                                          |
| CID # 145  | 480.32                               | 82.59                                                  | 8                                 | 2                                       | -1.531                         | 1.926                                           | 1.823                                                          |
| CID # 548  | 479.29                               | 87.64                                                  | 8                                 | 1                                       | -3.134                         | 3.438                                           | 3.329                                                          |
| CID # 789  | 474.31                               | 70.32                                                  | 7                                 | 1                                       | -1.521                         | 1.908                                           | 2.278                                                          |
| CID # 1530 | 491.17                               | 62.83                                                  | 6                                 | 2                                       | -4.755                         | 4.171                                           | 4.204                                                          |
| CID # 526  | 498.37                               | 69.9                                                   | 8                                 | 1                                       | -1.925                         | 2.457                                           | 2.377                                                          |
| CID # 1635 | 486.32                               | 85.9                                                   | 8                                 | 1                                       | -1.504                         | 1.910                                           | 2.133                                                          |
| CID # 791  | 498.31                               | 67.83                                                  | 7                                 | 1                                       | -3.539                         | 4.109                                           | 3.911                                                          |
| CID # 258  | 412.28                               | 49.86                                                  | 6                                 | 1                                       | -2.604                         | 2.905                                           | 2.464                                                          |
| CID # 768  | 475.31                               | 70.39                                                  | 8                                 | 0                                       | -1.630                         | 2.511                                           | 2.127                                                          |
| CID # 329  | 499.36                               | 78.76                                                  | 9                                 | 1                                       | -2.122                         | 2.126                                           | 2.023                                                          |
| CID # 1152 | 488.34                               | 68.58                                                  | 8                                 | 1                                       | -2.004                         | 2.608                                           | 2.032                                                          |
| CID # 1575 | 475.34                               | 62.11                                                  | 7                                 | 1                                       | -1.348                         | 2.108                                           | 2.564                                                          |
| CID # 1127 | 453.29                               | 90.36                                                  | 9                                 | 1                                       | -1.642                         | 0.964                                           | 1.337                                                          |
| CID # 86   | 426.27                               | 83.45                                                  | 8                                 | 1                                       | -1.695                         | 1.256                                           | 1.825                                                          |
| CID # 1700 | 469.31                               | 83.73                                                  | 8                                 | 1                                       | -2.172                         | 2.176                                           | 2.037                                                          |
| CID # 1056 | 495.31                               | 53.32                                                  | 7                                 | 0                                       | -2.650                         | 3.473                                           | 3.925                                                          |
| CID # 476  | 453.31                               | 74.5                                                   | 7                                 | 1                                       | -3.892                         | 3.882                                           | 3.481                                                          |
| CID # 605  | 426.27                               | 82.5                                                   | 8                                 | 2                                       | -1.724                         | 0.846                                           | 1.179                                                          |
| CID # 908  | 481.35                               | 69.53                                                  | 8                                 | 1                                       | -1.153                         | 1.635                                           | 1.346                                                          |
| CID # 2267 | 497.25                               | 100.28                                                 | 9                                 | 1                                       | -2.255                         | 2.715                                           | 3.389                                                          |
| CID # 1615 | 440.35                               | 44.53                                                  | 5                                 | 1                                       | -3.249                         | 4.094                                           | 3.443                                                          |
| CID # 1716 | 467.31                               | 101.03                                                 | 10                                | 1                                       | -1.826                         | 2.186                                           | 2.511                                                          |
| CID # 1133 | 445.32                               | 81.81                                                  | 9                                 | 2                                       | 0.230                          | -0.283                                          | 0.044                                                          |
| CID # 359  | 495.18                               | 79.52                                                  | 8                                 | 0                                       | -3.268                         | 3.324                                           | 2.909                                                          |
| CID # 2131 | 492.3                                | 95.56                                                  | 10                                | 1                                       | -2.113                         | 1.835                                           | 2.442                                                          |
| CID # 425  | 421.28                               | 58.29                                                  | 6                                 | 0                                       | -2.281                         | 3.210                                           | 2.803                                                          |

**Note:** The empirical-based decision states of each property are represented with different colors (green: excellent; yellow: medium; red: poor).

**Table S3.** ADMET absorption, distribution, and excretion properties of top-performing de novo designed drugs in terms of their role as potential inhibitors of the RBD of SARS-CoV-2 variants.

| Compound ID | Absorption                                         |                                             | Plasma Protein<br>Binding (%) | Distribution                     |                                         | % Unbound in<br>Plasma | Excretion<br>Clearance<br>(mL/min/kg) |
|-------------|----------------------------------------------------|---------------------------------------------|-------------------------------|----------------------------------|-----------------------------------------|------------------------|---------------------------------------|
|             | LogP <sub>app</sub> (Caco-<br>2 Perme-<br>ability) | LogP <sub>app</sub> (MDCK<br>Perme-ability) |                               | Volume<br>Distribution<br>(L/kg) | Blood-Brain<br>Barrier<br>(Probability) |                        |                                       |
| CID # 744   | -5.364                                             | 2.52E-05                                    | 83.998                        | 2.364                            | 0.807                                   | 12.193                 | 10.892                                |
| CID # 978   | -5.563                                             | 3.87E-05                                    | 88.453                        | 1.777                            | 0.748                                   | 8.316                  | 6.954                                 |
| CID # 1650  | -5.461                                             | 7.94E-06                                    | 56.023                        | 2.45                             | 0.914                                   | 55.618                 | 8.121                                 |
| CID # 465   | -4.949                                             | 9.78E-06                                    | 79.702                        | 0.682                            | 0.978                                   | 16.141                 | 9.428                                 |
| CID # 145   | -5.589                                             | 8.14E-06                                    | 64.638                        | 1.336                            | 0.805                                   | 48.553                 | 9.34                                  |
| CID # 548   | -4.997                                             | 1.52E-05                                    | 71.567                        | 3.033                            | 0.919                                   | 30.592                 | 8.385                                 |
| CID # 789   | -5.516                                             | 1.17E-05                                    | 65.269                        | 2.433                            | 0.690                                   | 49.437                 | 8.967                                 |
| CID # 1530  | -5.048                                             | 5.56E-05                                    | 96.360                        | 2.35                             | 0.992                                   | 0.980                  | 8.254                                 |
| CID # 526   | -5.482                                             | 8.02E-06                                    | 53.464                        | 1.069                            | 0.630                                   | 47.909                 | 7.05                                  |
| CID # 1635  | -5.496                                             | 7.42E-06                                    | 79.452                        | 1.432                            | 0.968                                   | 37.516                 | 7.363                                 |
| CID # 791   | -5.456                                             | 1.75E-05                                    | 85.019                        | 1.531                            | 0.946                                   | 11.748                 | 8.985                                 |
| CID # 258   | -5.092                                             | 9.75E-06                                    | 70.180                        | 1.477                            | 0.802                                   | 27.740                 | 11.233                                |



|            |        |          |        |       |       |        |        |
|------------|--------|----------|--------|-------|-------|--------|--------|
| CID # 768  | -5.683 | 3.42E-05 | 78.999 | 1.481 | 0.962 | 26.455 | 10.119 |
| CID # 329  | -5.370 | 6.92E-06 | 68.387 | 1.545 | 0.631 | 45.506 | 7.305  |
| CID # 1152 | -5.296 | 1.27E-05 | 68.135 | 1.054 | 0.858 | 35.218 | 9.607  |
| CID # 1575 | -5.532 | 1.33E-05 | 56.781 | 1.031 | 0.955 | 43.539 | 10.959 |
| CID # 1127 | -5.339 | 6.06E-06 | 79.225 | 2.081 | 0.944 | 36.630 | 5.044  |
| CID # 86   | -5.085 | 3.12E-05 | 82.581 | 1.471 | 0.903 | 23.950 | 9.665  |
| CID # 1700 | -5.002 | 1.07E-05 | 59.641 | 7.171 | 0.847 | 42.828 | 3.883  |
| CID # 1056 | -5.216 | 2.11E-05 | 90.604 | 1.623 | 0.806 | 4.262  | 8.517  |
| CID # 476  | -5.486 | 1.05E-05 | 93.881 | 2.133 | 0.800 | 5.681  | 5.962  |
| CID # 605  | -5.273 | 8.47E-06 | 51.239 | 1.869 | 0.977 | 52.166 | 8.937  |
| CID # 908  | -5.997 | 9.48E-06 | 47.007 | 1.457 | 0.802 | 52.220 | 7.811  |
| CID # 2267 | -5.081 | 3.49E-05 | 94.937 | 3.159 | 0.915 | 3.216  | 7.191  |
| CID # 1615 | -5.364 | 1.52E-05 | 65.867 | 5.515 | 0.652 | 28.494 | 11.927 |
| CID # 1716 | -5.039 | 1.37E-05 | 79.296 | 1.057 | 0.562 | 31.526 | 9.153  |
| CID # 1133 | -5.969 | 4.71E-06 | 64.854 | 1.701 | 0.888 | 51.219 | 4.219  |
| CID # 359  | -4.860 | 1.99E-05 | 96.531 | 1.924 | 0.585 | 1.893  | 6.446  |
| CID # 2131 | -5.219 | 7.74E-06 | 77.664 | 1.452 | 0.944 | 29.811 | 5.802  |
| CID # 425  | -4.858 | 1.98E-05 | 70.309 | 2.294 | 0.876 | 22.847 | 8.688  |

**Note:** The empirical-based decision states of each property are represented with different colors (green: excellent; yellow: medium; red: poor).

**Table S4.** ADMET metabolism and toxicity properties of top-performing de novo designed drugs in terms of their role as potential inhibitors of the RBD of SARS-CoV-2 variants.

| Compound ID | Metabolism                         |                                            | hERG Blocker<br>(Probability) | Toxicity                                 |                                       |
|-------------|------------------------------------|--------------------------------------------|-------------------------------|------------------------------------------|---------------------------------------|
|             | Cytochrome 450 Inhibitor           | Cytochrome 450 Substrate                   |                               | Human<br>Hepatotoxicity<br>(Probability) | Ames<br>Mutagenicity<br>(Probability) |
| CID # 744   | CYP2D6                             | CYP2C19, CYP3A4                            | 0.826                         | 0.482                                    | 0.007                                 |
| CID # 978   | CYP2D6, CYP3A4                     | CYP2C19, CYP3A4                            | 0.739                         | 0.961                                    | 0.019                                 |
| CID # 1650  |                                    | CYP3A4                                     | 0.824                         | 0.776                                    | 0.301                                 |
| CID # 465   | CYP2D6                             | CYP2C19, CYP2D6, CYP3A4                    | 0.430                         | 0.945                                    | 0.017                                 |
| CID # 145   | CYP2D6                             | CYP2C19, CYP2D6, CYP3A4                    | 0.557                         | 0.454                                    | 0.051                                 |
| CID # 548   | CYP2D6                             | CYP2D6                                     | 0.872                         | 0.545                                    | 0.075                                 |
| CID # 789   | CYP2D6                             | CYP2C19, CYP2D6, CYP3A4                    | 0.845                         | 0.784                                    | 0.013                                 |
| CID # 1530  | CYP2C19, CYP2D6, CYP3A4            | CYP1A2, CYP2C19, CYP2C9,<br>CYP2D6, CYP3A4 | 0.952                         | 0.473                                    | 0.013                                 |
| CID # 526   |                                    | CYP2C19, CYP2D6, CYP3A4                    | 0.399                         | 0.565                                    | 0.037                                 |
| CID # 1635  |                                    | CYP2D6                                     | 0.312                         | 0.798                                    | 0.016                                 |
| CID # 791   | CYP2D6                             | CYP2D6, CYP3A4                             | 0.991                         | 0.994                                    | 0.033                                 |
| CID # 258   | CYP2D6                             | CYP2C19, CYP2D6                            | 0.906                         | 0.236                                    | 0.018                                 |
| CID # 768   |                                    | CYP2D6                                     | 0.737                         | 0.401                                    | 0.109                                 |
| CID # 329   |                                    | CYP2C19, CYP2D6, CYP3A4                    | 0.212                         | 0.070                                    | 0.419                                 |
| CID # 1152  |                                    | CYP2D6, CYP3A4                             | 0.863                         | 0.893                                    | 0.029                                 |
| CID # 1575  | CYP2D6, CYP3A4                     | CYP2C19, CYP2D6, CYP3A4                    | 0.443                         | 0.536                                    | 0.014                                 |
| CID # 1127  |                                    | CYP2C19, CYP2D6                            | 0.230                         | 0.302                                    | 0.009                                 |
| CID # 86    | CYP2D6                             | CYP2C19, CYP2D6, CYP3A4                    | 0.517                         | 0.839                                    | 0.074                                 |
| CID # 1700  |                                    | CYP2D6, CYP3A4                             | 0.795                         | 0.635                                    | 0.466                                 |
| CID # 1056  | CYP2D6                             | CYP2D6, CYP3A4                             | 0.951                         | 0.281                                    | 0.029                                 |
| CID # 476   | CYP2D6                             | CYP2D6                                     | 0.976                         | 0.833                                    | 0.014                                 |
| CID # 605   |                                    |                                            | 0.454                         | 0.177                                    | 0.072                                 |
| CID # 908   |                                    | CYP2D6                                     | 0.460                         | 0.242                                    | 0.016                                 |
| CID # 2267  | CYP2C19, CYP2C9, CYP2D6,<br>CYP3A4 | CYP2C9, CYP3A4                             | 0.440                         | 0.914                                    | 0.024                                 |
| CID # 1615  | CYP2D6                             | CYP2C19, CYP2D6, CYP3A4                    | 0.813                         | 0.265                                    | 0.123                                 |
| CID # 1716  | CYP2D6                             | CYP2C19, CYP3A4                            | 0.814                         | 0.913                                    | 0.358                                 |

|            |                         |                 |       |       |       |
|------------|-------------------------|-----------------|-------|-------|-------|
| CID # 1133 |                         | CYP2C19, CYP2D6 | 0.117 | 0.623 | 0.023 |
| CID # 359  | CYP2C19, CYP2C9, CYP3A4 | CYP2C9, CYP3A4  | 0.628 | 0.980 | 0.056 |
| CID # 2131 |                         | CYP2D6          | 0.666 | 0.937 | 0.036 |
| CID # 425  | CYP2D6                  | CYP2D6          | 0.898 | 0.695 | 0.030 |

**Note:** The empirical-based decision states of each property are represented with different colors (green: excellent; yellow: medium; red: poor).

**Table S5.** ADMET toxicity and drug-likeness properties of top-performing de novo designed drugs in terms of their role as potential inhibitors of the RBD of SARS-CoV-2 variants.

| Compound ID | Toxicity                       |                                    | Drug-likeness       |                               |              |                                |
|-------------|--------------------------------|------------------------------------|---------------------|-------------------------------|--------------|--------------------------------|
|             | Carcino-genicity (Probability) | Respiratory Toxicity (Probability) | Drug-likeness Score | Synthetic Accessibility Score | MCE-18 Score | Natural Product-likeness Score |
| CID # 744   | 0.061                          | 0.739                              | 0.394               | 2.576                         | 18.000       | -1.145                         |
| CID # 978   | 0.053                          | 0.984                              | 0.39                | 2.876                         | 96.600       | -2.065                         |
| CID # 1650  | 0.031                          | 0.965                              | 0.406               | 3.312                         | 74.227       | -1.371                         |
| CID # 465   | 0.009                          | 0.933                              | 0.308               | 3.507                         | 50.612       | -1.149                         |
| CID # 145   | 0.097                          | 0.979                              | 0.343               | 3.485                         | 63.810       | -1.244                         |
| CID # 548   | 0.575                          | 0.966                              | 0.423               | 2.557                         | 47.122       | -1.915                         |
| CID # 789   | 0.153                          | 0.953                              | 0.48                | 3.156                         | 79.698       | -1.395                         |
| CID # 1530  | 0.066                          | 0.946                              | 0.321               | 2.558                         | 14.000       | -1.164                         |
| CID # 526   | 0.067                          | 0.976                              | 0.376               | 3.08                          | 63.333       | -1.328                         |
| CID # 1635  | 0.025                          | 0.985                              | 0.344               | 3.552                         | 66.000       | -1.24                          |
| CID # 791   | 0.092                          | 0.994                              | 0.515               | 2.75                          | 58.047       | -1.266                         |
| CID # 258   | 0.023                          | 0.972                              | 0.511               | 2.241                         | 31.027       | -1.399                         |
| CID # 768   | 0.481                          | 0.991                              | 0.375               | 2.52                          | 44.000       | -2.062                         |
| CID # 329   | 0.297                          | 0.782                              | 0.377               | 2.639                         | 40.000       | -1.846                         |
| CID # 1152  | 0.055                          | 0.989                              | 0.424               | 3.095                         | 55.814       | -1.557                         |
| CID # 1575  | 0.034                          | 0.989                              | 0.382               | 3.569                         | 63.721       | -0.763                         |
| CID # 1127  | 0.130                          | 0.953                              | 0.421               | 2.789                         | 19.000       | -1.443                         |
| CID # 86    | 0.814                          | 0.788                              | 0.423               | 3.206                         | 32.000       | -1.951                         |
| CID # 1700  | 0.477                          | 0.961                              | 0.572               | 3.533                         | 72.767       | -1.894                         |
| CID # 1056  | 0.084                          | 0.983                              | 0.331               | 2.553                         | 54.878       | -1.512                         |
| CID # 476   | 0.174                          | 0.958                              | 0.582               | 2.994                         | 68.372       | -1.508                         |
| CID # 605   | 0.051                          | 0.845                              | 0.524               | 2.331                         | 35.657       | -1.453                         |
| CID # 908   | 0.086                          | 0.982                              | 0.563               | 3.161                         | 72.333       | -1.997                         |
| CID # 2267  | 0.085                          | 0.946                              | 0.334               | 2.962                         | 77.189       | -1.65                          |
| CID # 1615  | 0.049                          | 0.972                              | 0.437               | 3.221                         | 51.556       | -1.097                         |
| CID # 1716  | 0.879                          | 0.913                              | 0.378               | 3.262                         | 64.103       | -2.099                         |
| CID # 1133  | 0.021                          | 0.979                              | 0.423               | 2.771                         | 35.368       | -1.916                         |
| CID # 359   | 0.606                          | 0.406                              | 0.352               | 3.184                         | 94.030       | -2.15                          |
| CID # 2131  | 0.948                          | 0.938                              | 0.512               | 3.331                         | 89.700       | -2.067                         |
| CID # 425   | 0.168                          | 0.956                              | 0.396               | 2.505                         | 15.000       | -1.681                         |

**Note:** The empirical-based decision states of each property are represented with different colors (green: excellent; yellow: medium; red: poor).

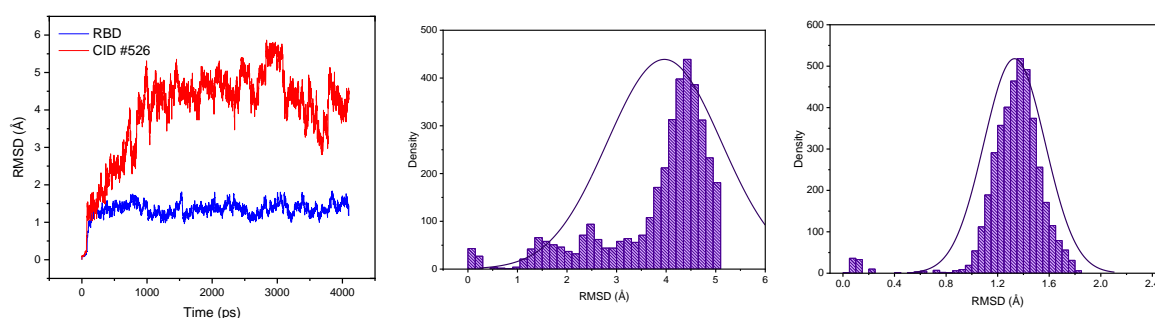

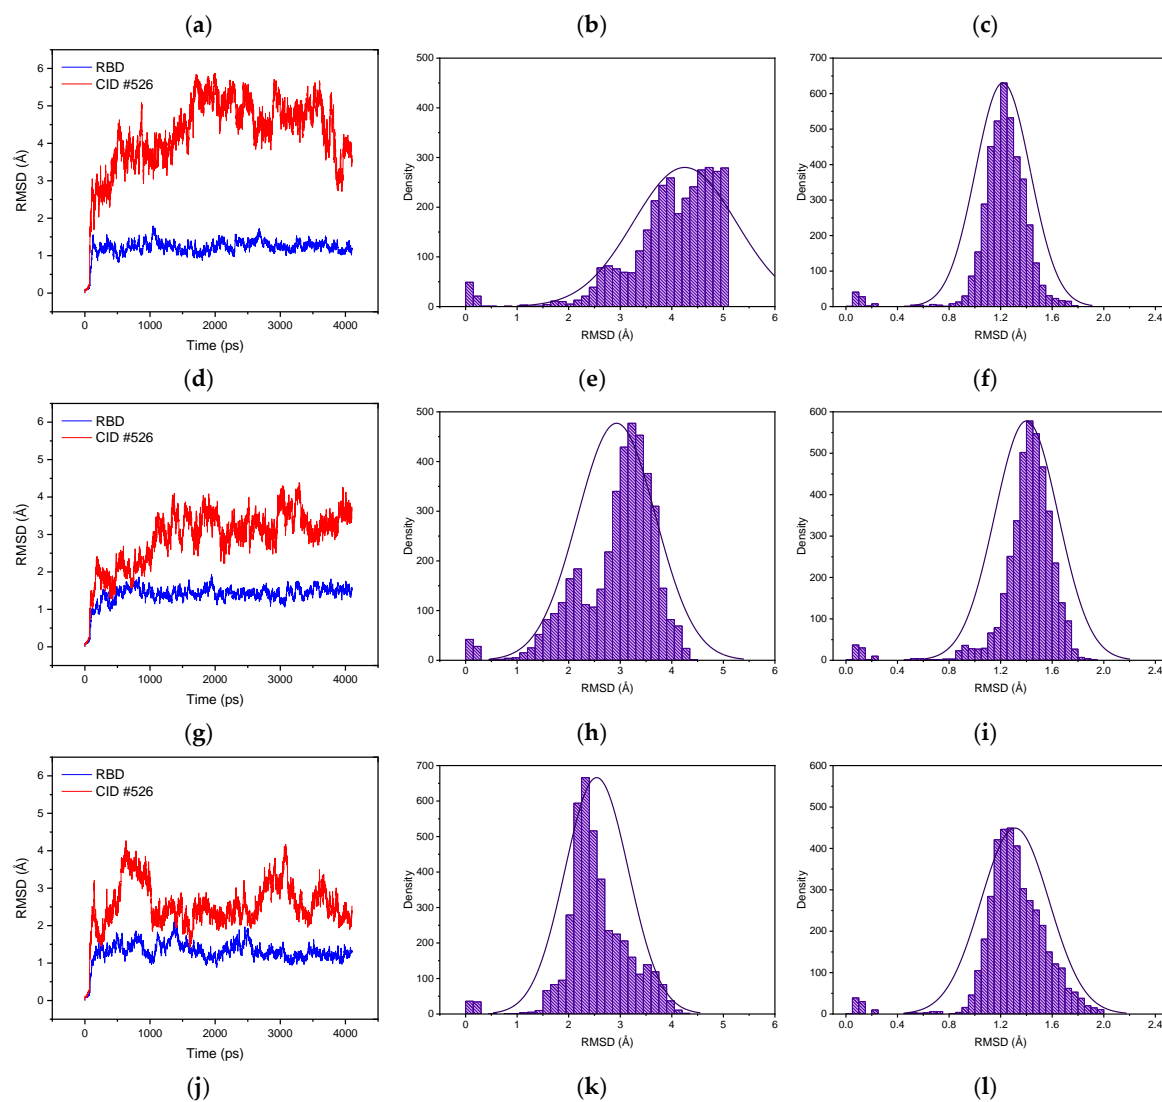

**Figure S5.** RMSD profiles of docked CID #526 designed using generative neural networks of the RBD, RMSD histogram of the ligand, and RMSD histogram of the receptor for (a–c) wild-type, (d–f) B.1.1.7 variant, (g–i) B.135 variant, and (j–l) P.1 variant of SARS-CoV-2.

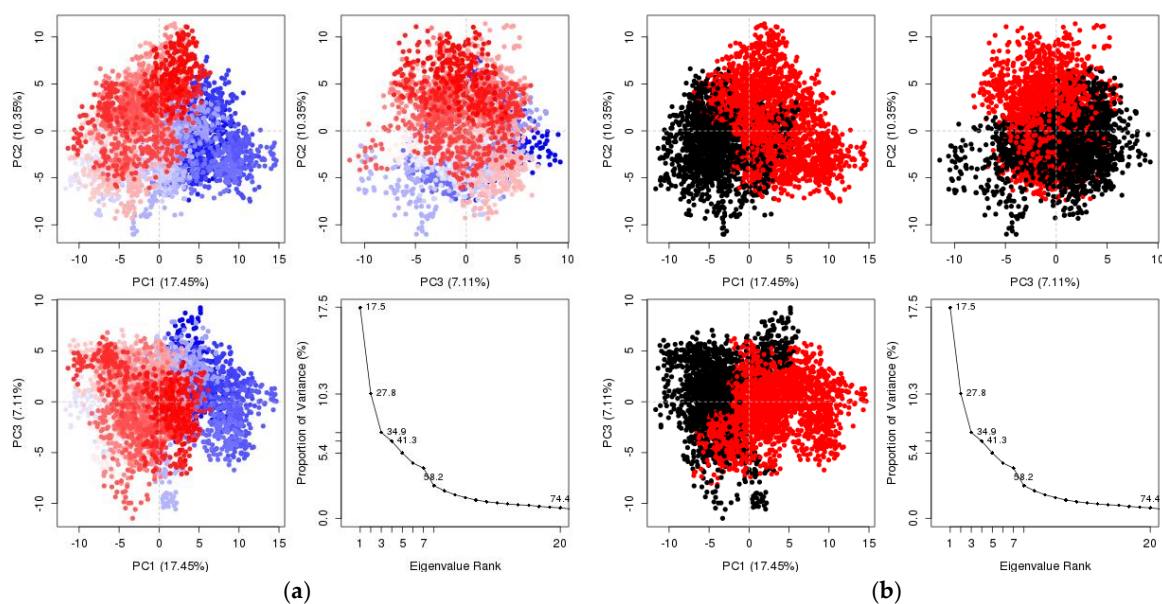



**Figure S6.** (a) Principal Component Analysis (PCA) concerning the MD trajectory of the binding of CID #526 to the RBD of wild-type SARS-CoV-2. The trajectory frames are colored from blue to white to red, which corresponds to their order with respect to time. (b) Simple clustering in PC subspace. The conformations were divided into two clusters (black and red) according to the top three PC spaces shown in the PC subspace.

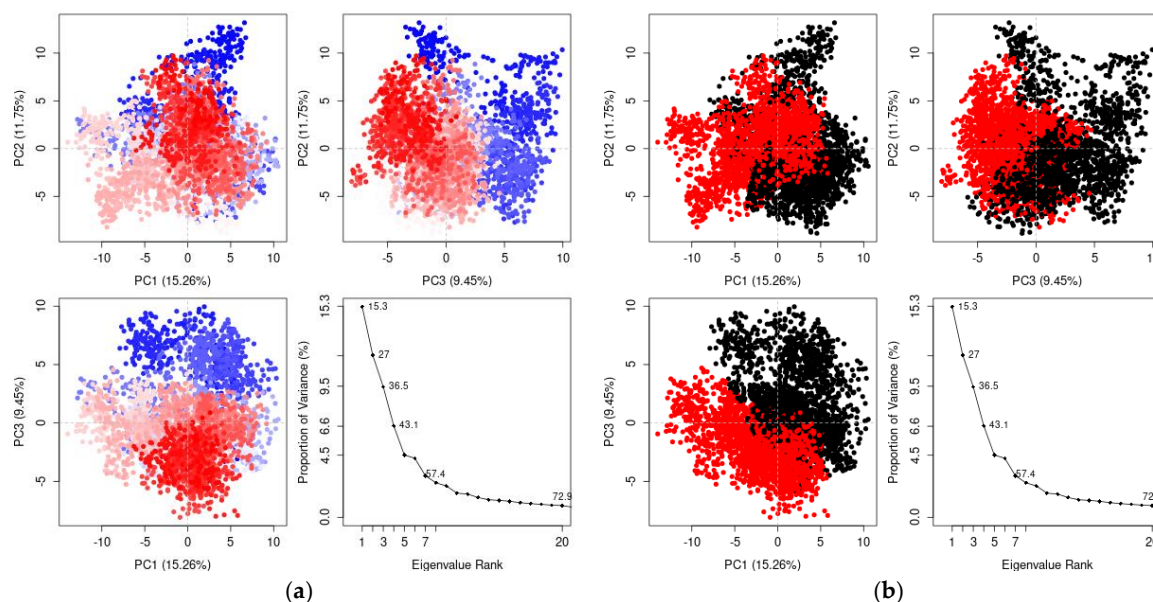

**Figure S7.** (a) Principal Component Analysis (PCA) concerning the MD trajectory of the unbinding of CID #526 to the RBD of wild-type SARS-CoV-2. The trajectory frames are colored from blue to white to red, which corresponds to their order with respect to time. (b) Simple clustering in PC subspace. The conformations were divided into two clusters (black and red) according to the top three PC spaces shown in the PC subspace.

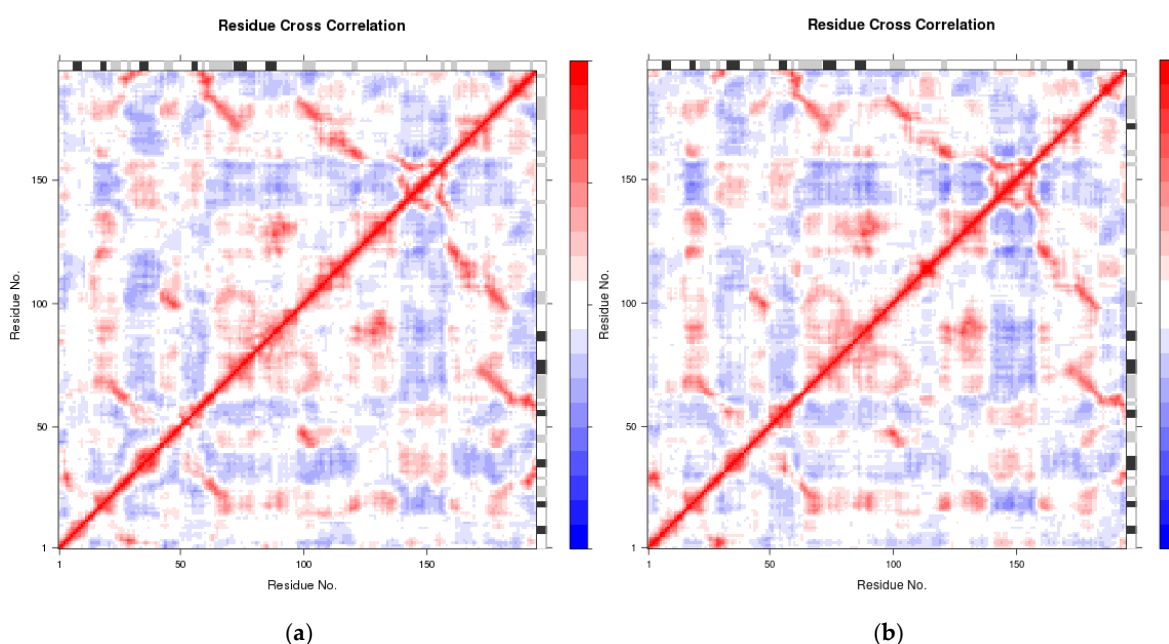

**Figure S8.** Dynamical residue cross-correlation map for the MD trajectory of the (a) binding process and (b) unbinding process of the receptor–ligand complex involving CID #526 docked in the RBD of wild-type SARS-CoV-2. PCA results regarding trajectory with trajectory frames colored from blue to white to red, which corresponds to their order with respect to time.

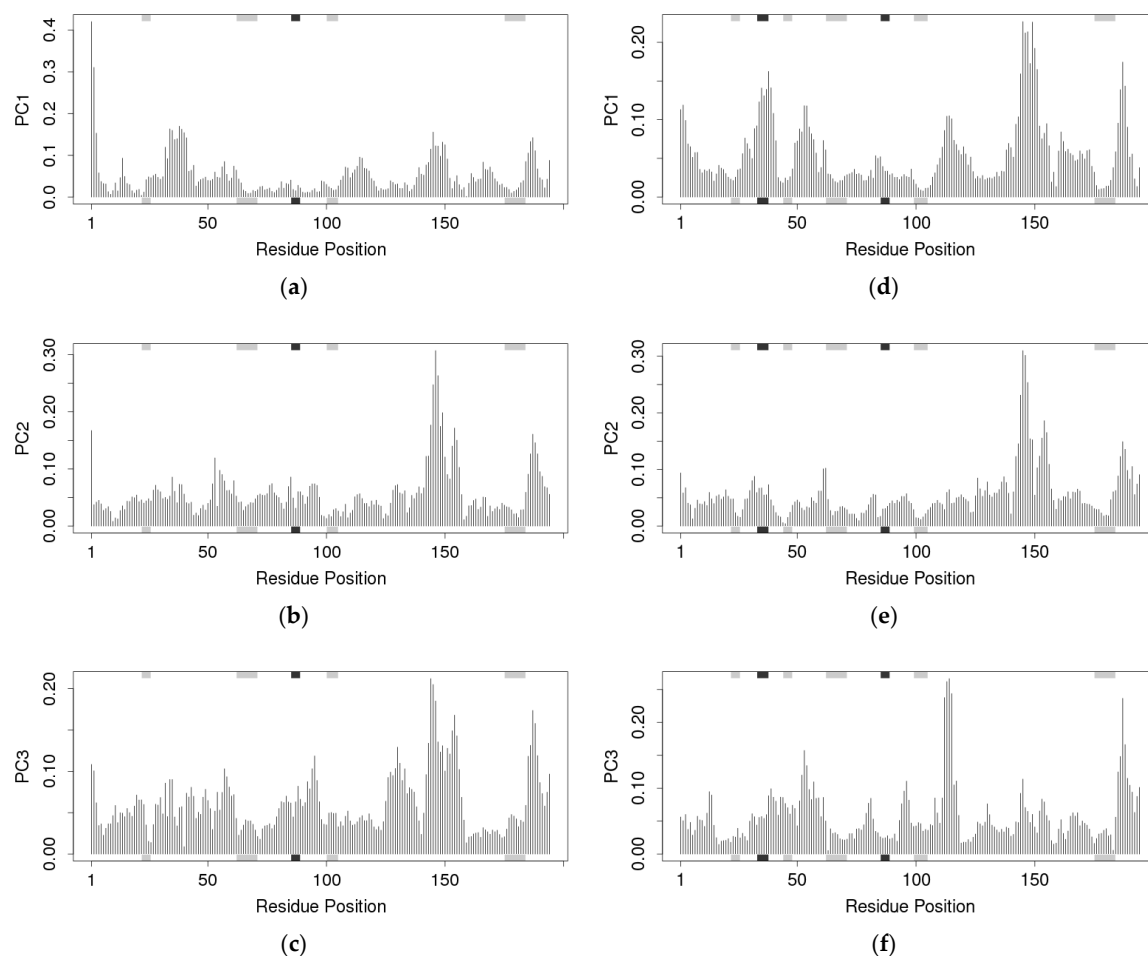

**Figure S9.** Residue-wise loading for (a) PC1, (b) PC2, and (c) PC3 of the binding process of the receptor–ligand complex involving CID #526 docked in the RBD of wild-type SARS-CoV-2. Residue-wise loading for (d) PC1, (e) PC2, and (f) PC3 of the unbinding process of the receptor–ligand complex involving CID #526 docked in wild-type SARS-CoV-2.

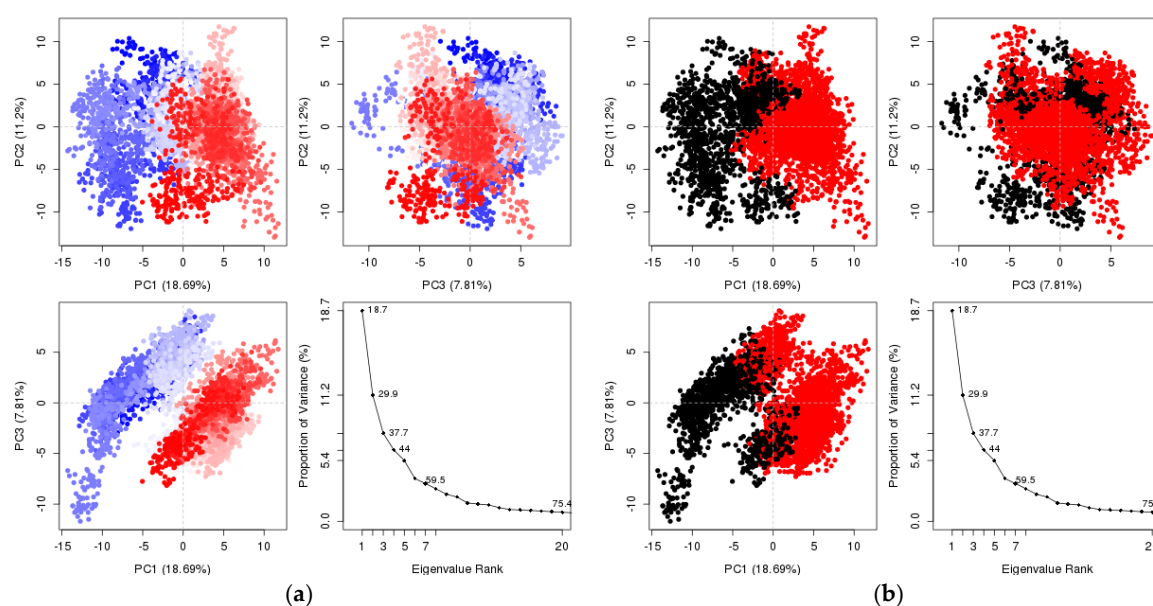

**Figure S10.** (a) Principal Component Analysis (PCA) concerning the MD trajectory of the binding of CID #526 to the RBD of the B.1.1.7 variant of SARS-CoV-2. The trajectory frames are colored from blue to white to red, which corresponds to their order with respect to time. (b) Simple clustering in PC

subspace. The conformations were divided into two clusters (black and red) according to the top three PC spaces shown in the PC subspace.

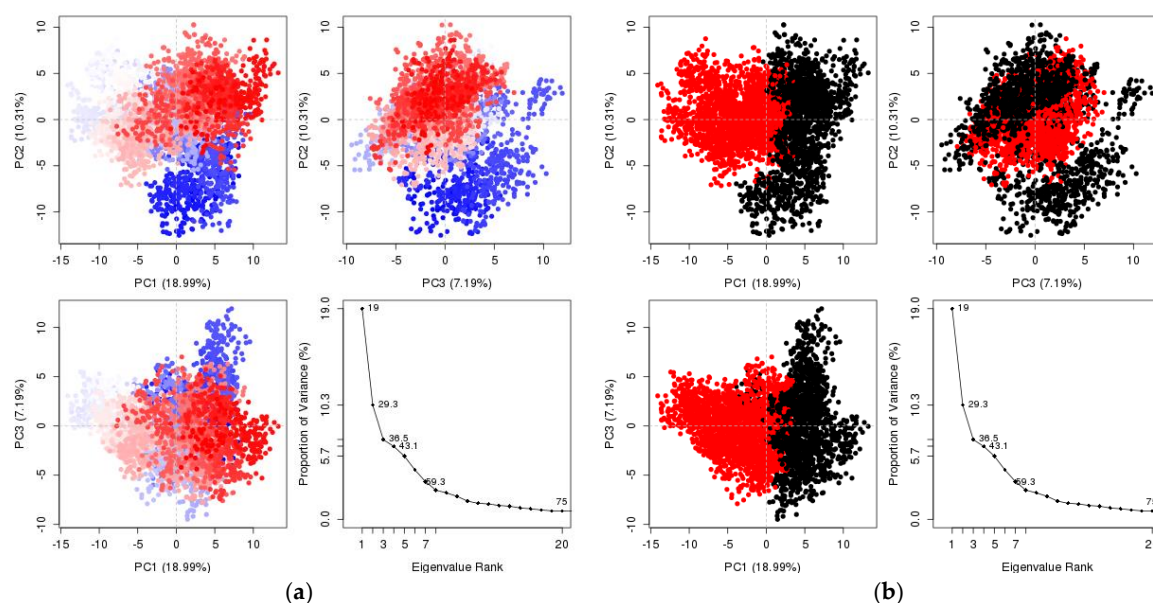

**Figure S11.** (a) Principal Component Analysis (PCA) concerning the MD trajectory of the binding of CID #526 to the RBD of the B.1.1.7 variant of SARS-CoV-2. The trajectory frames are colored from blue to white to red, which corresponds to their order with respect to time. (b) Simple clustering in PC subspace. The conformations were divided into two clusters (black and red) according to the top three PC spaces shown in the PC subspace.

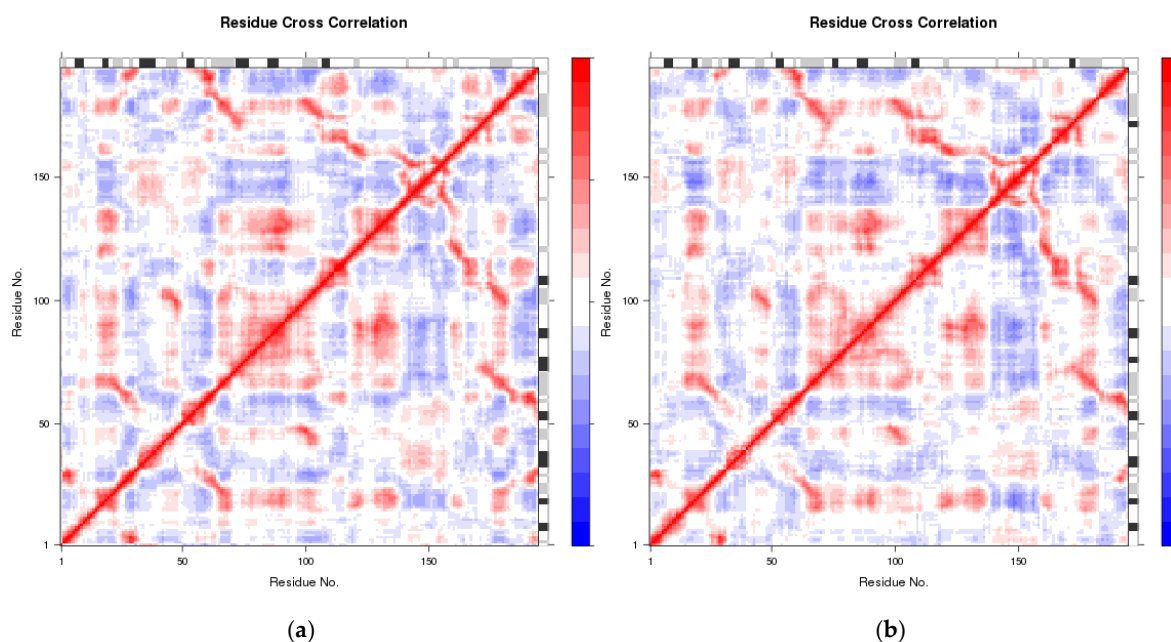

**Figure S12.** Dynamical residue cross-correlation map for the MD trajectory of the (a) binding process and (b) unbinding process of the receptor-ligand complex involving CID #526 docked in the RBD of the B.1.1.7 variant of SARS-CoV-2. PCA results for trajectory with trajectory frames colored from blue to white to red, which corresponds to their order with respect to time.

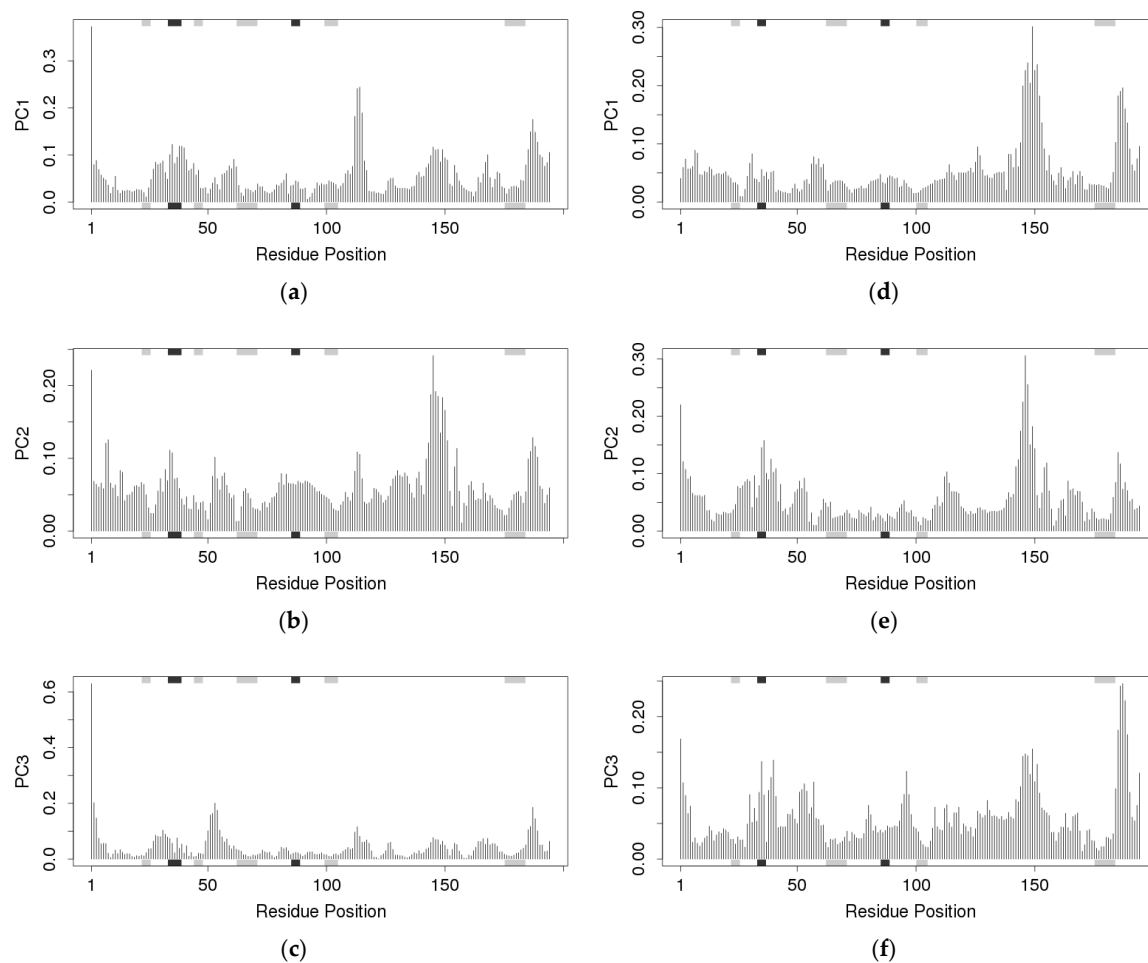

**Figure S13.** Residue-wise loading for (a) PC1, (b) PC2, and (c) PC3 of the binding process of the receptor–ligand complex involving CID #526 docked in the RBD of the B.1.1.7 variant of SARS-CoV-2. Residue-wise loading for (d) PC1, (e) PC2, and (f) PC3 of the unbinding process of the receptor–ligand complex involving CID #526 docked in the B.1.1.7 variant of SARS-CoV-2.

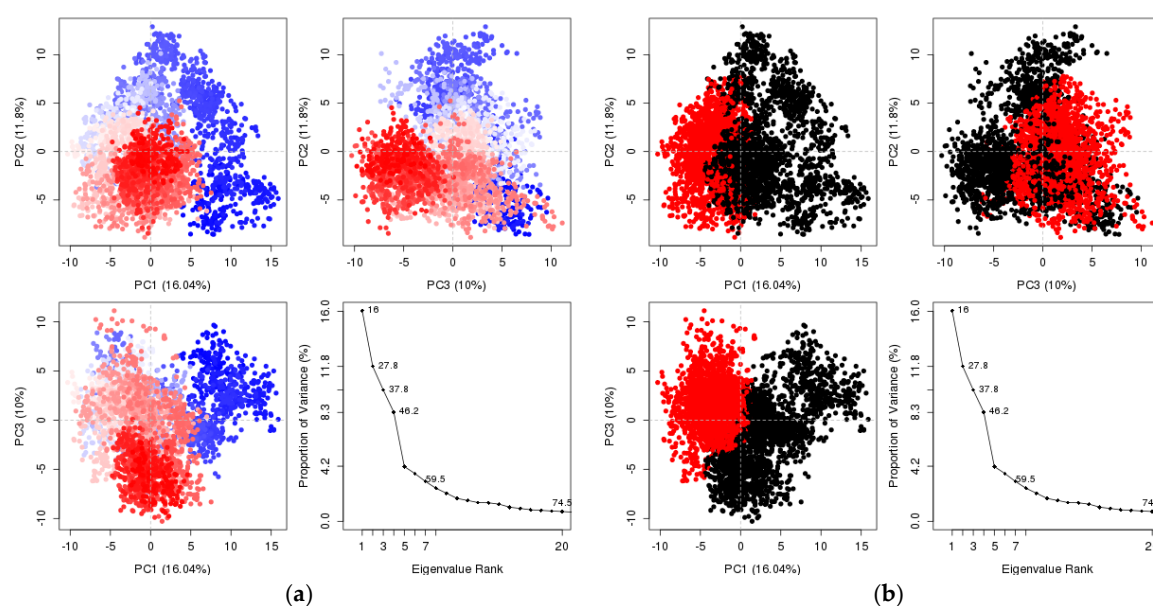

**Figure S14.** (a) Principal Component Analysis (PCA) concerning the MD trajectory of the binding of CID #526 to the RBD of the B.1.351 variant of SARS-CoV-2. The trajectory frames are colored from blue to white to red, which corresponds to their order with respect to time. (b) Simple clustering in

PC subspace. The conformations were divided into two clusters (black and red) according to the top three PC spaces shown in the PC subspace.

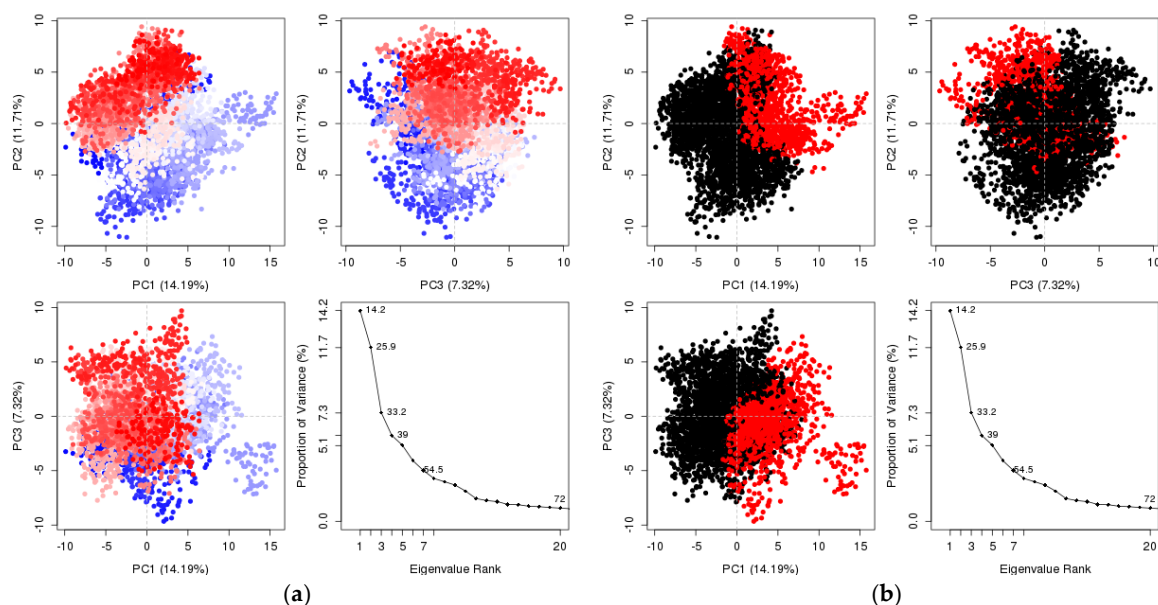

**Figure S15.** (a) Principal Component Analysis (PCA) concerning the MD trajectory of the binding of CID #526 to the RBD of the B.1.351 variant of SARS-CoV-2. The trajectory frames are colored from blue to white to red, which corresponds to their order with respect to time. (b) Simple clustering in PC subspace. The conformations were divided into two clusters (black and red) according to the top three PC spaces shown in the PC subspace.

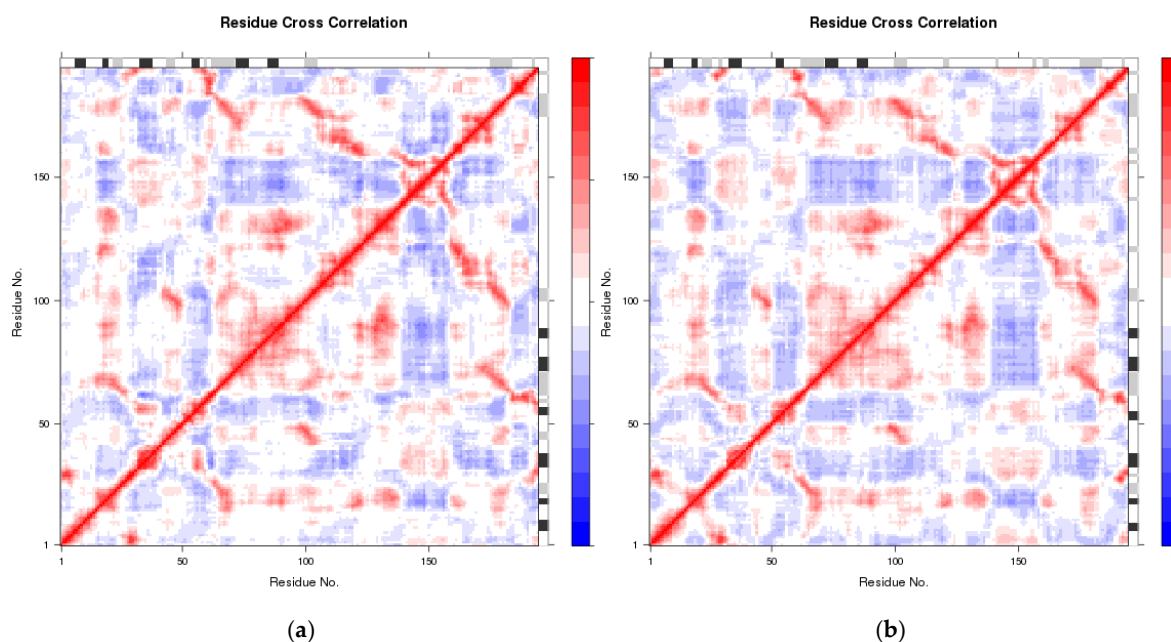

**Figure S16.** Dynamical residue cross-correlation map for the MD trajectory of the (a) binding process and (b) unbinding process of the receptor-ligand complex involving CID #526 docked in the RBD of the B.1.351 variant of SARS-CoV-2. PCA results for trajectory with trajectory frames colored from blue to white to red, which corresponds to their order with respect to time.



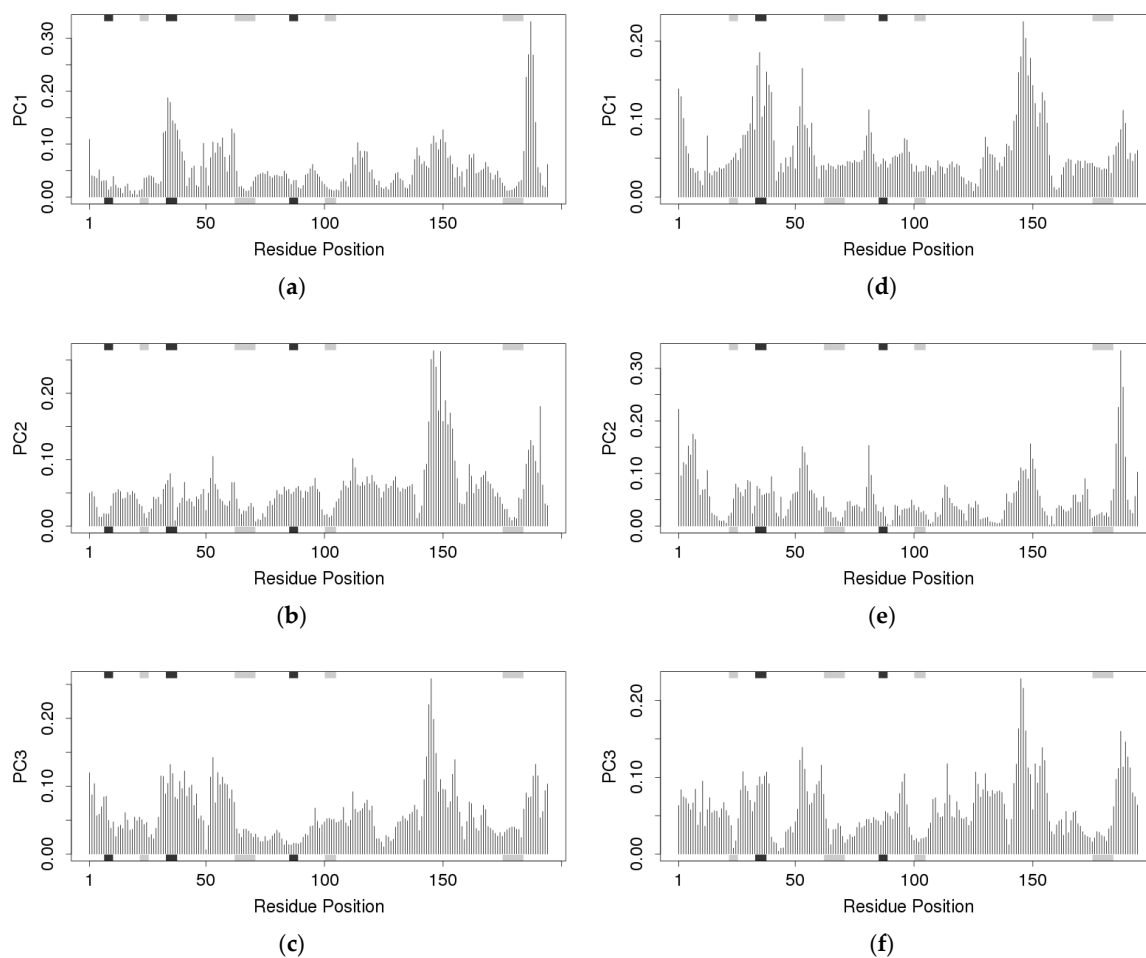

**Figure S17.** Residue-wise loading for (a) PC1, (b) PC2, and (c) PC3 of the binding process of the receptor–ligand complex involving CID #526 docked in the RBD of the B.1.351 variant of SARS-CoV-2. Residue-wise loading for (d) PC1, (e) PC2, and (f) PC3 of the unbinding process of the receptor–ligand complex involving CID #526 docked in the B.1.351 variant of SARS-CoV-2.

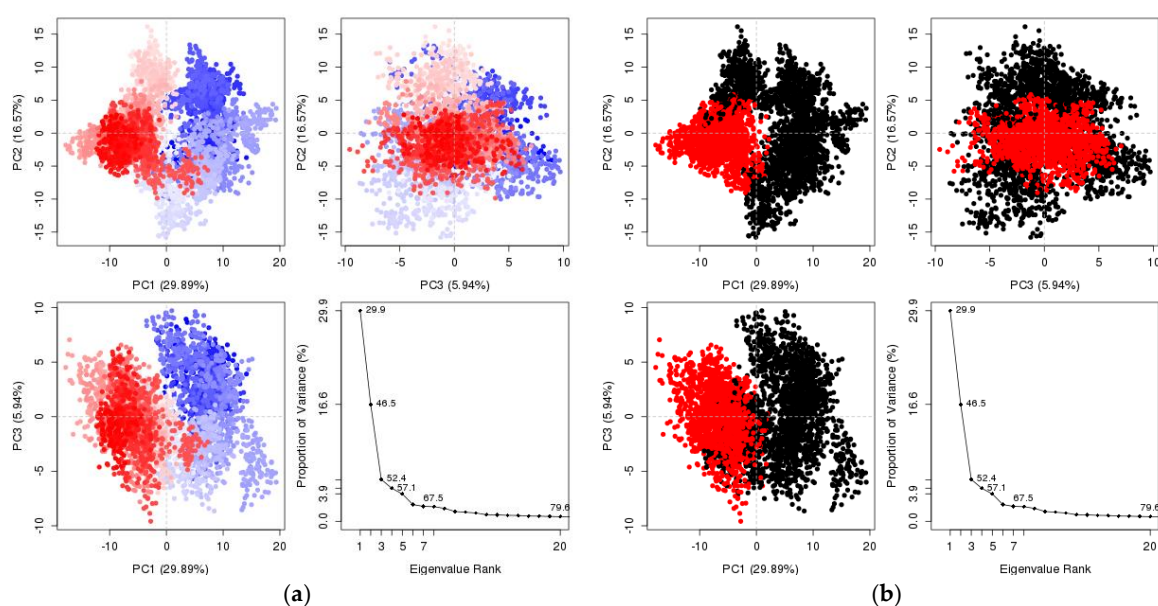

**Figure S18.** (a) Principal Component Analysis (PCA) concerning the MD trajectory of the binding of CID #526 to the RBD of P.1 variant of SARS-CoV-2. The trajectory frames are colored from blue to white to red, which corresponds to their order with respect to time. (b) Simple clustering in PC

subspace. The conformations were divided into two clusters (black and red) according to the top three PC spaces shown in the PC subspace.

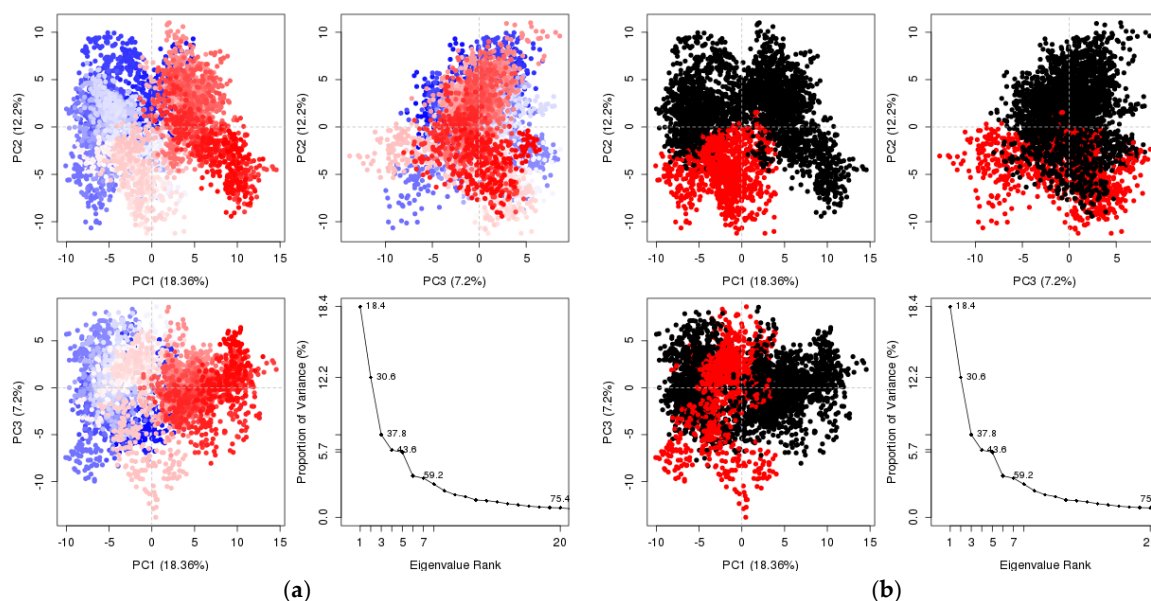

**Figure S19.** (a) Principal Component Analysis (PCA) concerning the MD trajectory of the binding of CID #526 to the RBD of P.1 variant of SARS-CoV-2. The trajectory frames are colored from blue to white to red, which corresponds to their order with respect to time. (b) Simple clustering in PC subspace. The conformations were divided into two clusters (black and red) according to the top three PC spaces shown in the PC subspace.

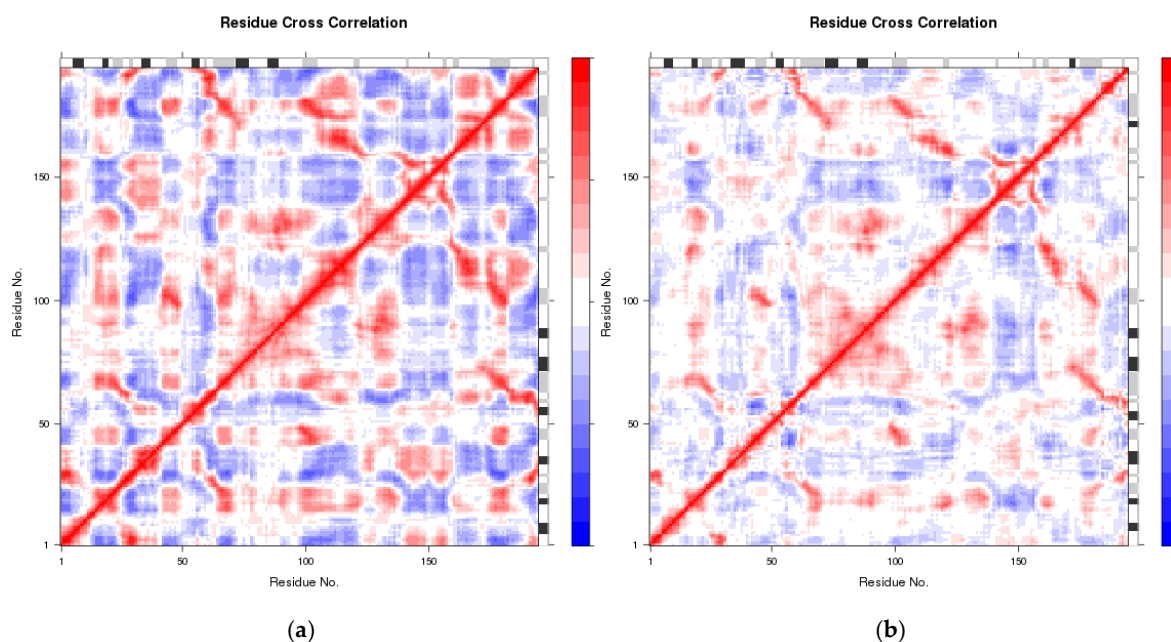

**Figure S20.** Dynamical residue cross-correlation map for the MD trajectory of the (a) binding process and (b) unbinding process of the receptor-ligand complex involving CID #526 docked in the RBD of P.1 variant SARS CoV-2. PCA results for trajectory with trajectory frames colored from blue to red, which corresponds to their order with respect to time.

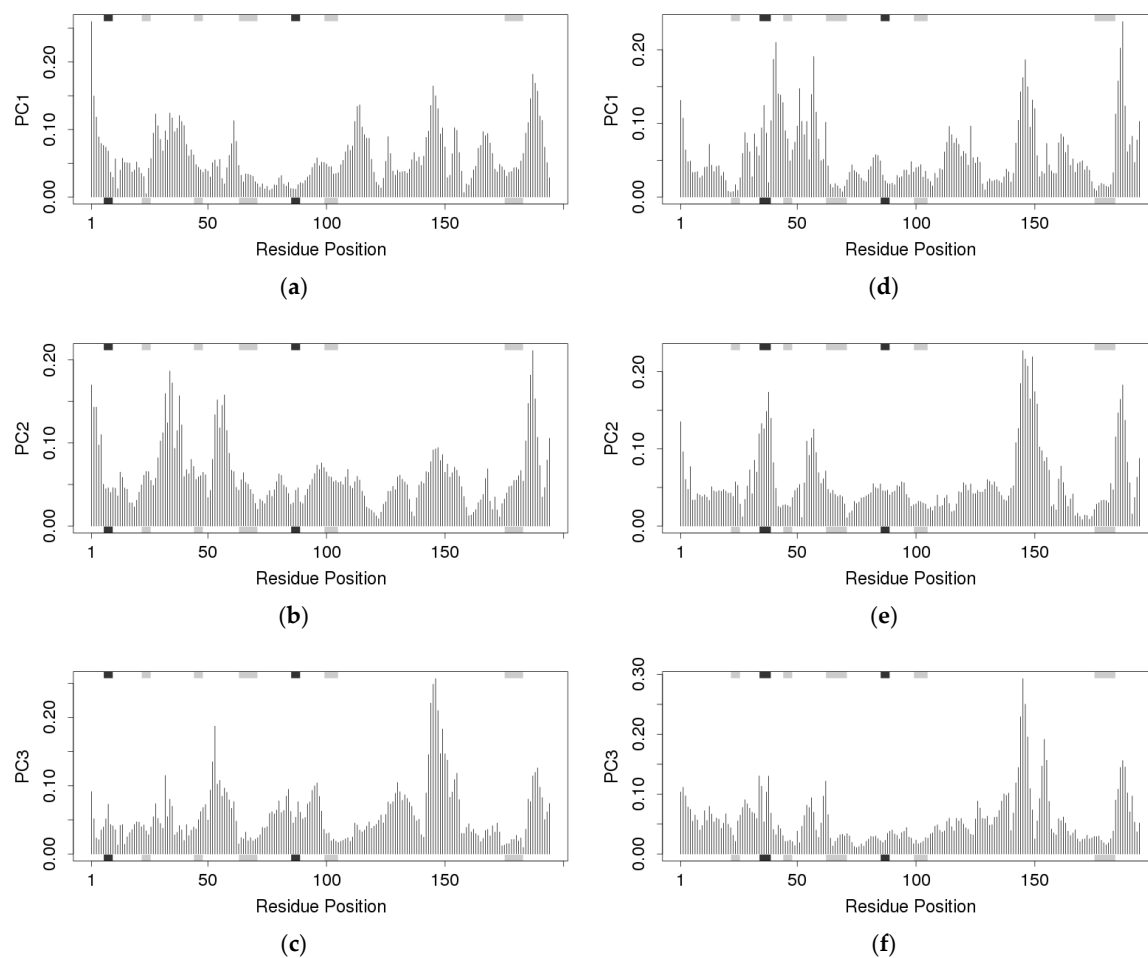

**Figure S21.** Residue-wise loading for (a) PC1, (b) PC2, and (c) PC3 of the binding process of the receptor–ligand complex involving CID #526 docked in the RBD of P.1 variant of SARS-CoV-2. Residue-wise loading for (d) PC1, (e) PC2, and (f) PC3 of the unbinding process of the receptor–ligand complex involving CID #526 docked in P.1 variant of SARS-CoV-2.

**Table S6.** Binding Energy of CID #526 against various variants of SARS-CoV-2.

| SARS-CoV-2 Variant | $\Delta G_{PB}$ (kcal mol <sup>-1</sup> ) |
|--------------------|-------------------------------------------|
| Wild               | −6.15                                     |
| B.1.1.7            | −3.85                                     |
| B.1.351            | −6.12                                     |
| P.1                | −5.19                                     |
